# Supplementary material for: Head-to-head comparison of diagnostic accuracy of TB screening tests: Chest-X-ray, Xpert TB host response, and C-reactive protein
Source: bioRxiv or medRxiv preprint supplement (doi:10.1101/2024.06.20.24308402), 2024-06-21
Supplement: Supplementary file [file media-1.pdf]

### **Additional contributors from the R2D2 TB Network**

| <b>First name</b>      | <b>Surname</b> | <b>Affiliation</b>                                                                               |
|------------------------|----------------|--------------------------------------------------------------------------------------------------|
| <b>India</b>           |                |                                                                                                  |
| Shanmugasundaram       | Elango         | Christian Medical College, Vellore, India                                                        |
| Jerusha                | Emmanuel       | Christian Medical College, Vellore, India                                                        |
| Vinita                 | Ernest         | Christian Medical College, Vellore, India                                                        |
| Priyadarshini          | Gajendran      | Christian Medical College, Vellore, India                                                        |
| Flavita                | John           | Christian Medical College, Vellore, India                                                        |
| Bharath                | Karthikeyan    | Christian Medical College, Vellore, India                                                        |
| Divya                  | Mangal         | Christian Medical College, Vellore, India                                                        |
| Swetha                 | Sankar         | Christian Medical College, Vellore, India                                                        |
| Rajasekar              | Sekar          | Christian Medical College, Vellore, India                                                        |
| Reena                  | Sekar          | Christian Medical College, Vellore, India                                                        |
| Deepa                  | Shankar        | Christian Medical College, Vellore, India                                                        |
| Mary                   | Shibiya        | Christian Medical College, Vellore, India                                                        |
| Sai                    | Vijayasree     | Christian Medical College, Vellore, India                                                        |
| <b>Philippines</b>     |                |                                                                                                  |
| Jared                  | Almonte        | De La Salle Medical and Health Sciences Institute, Cavite                                        |
| Kevin Joshua           | Alonzo         | National TB Reference Laboratory, Research Institute for Tropical Medicine, Department of Health |
| Mary Faith             | Angcaya        | De La Salle Medical and Health Sciences Institute, Cavite                                        |
| Joseph Edwin L.        | Bascuña        | National TB Reference Laboratory, Research Institute for Tropical Medicine, Department of Health |
| Ramon P.               | Basilio        | National TB Reference Laboratory, Research Institute for Tropical Medicine, Department of Health |
| Asella Ruvijean        | Cariaga        | De La Salle Medical and Health Sciences Institute, Cavite, Philippines                           |
| Gabriella              | Castillon      | De La Salle Medical and Health Sciences Institute, Cavite                                        |
| Karlo                  | Dayawon        | De La Salle Medical and Health Sciences Institute, Cavite                                        |
| Raul                   | Destura        | National Institutes of Health, University of the Philippines Manila                              |
| Jezreel                | Esguerra       | De La Salle Medical and Health Sciences Institute, Cavite                                        |
| Eleonor                | Garcia         | De La Salle Medical and Health Sciences Institute, Cavite                                        |
| Darecil                | Gelina         | De La Salle Medical and Health Sciences Institute, Cavite                                        |
| Joseph Aldwin          | Goleña         | De La Salle Medical and Health Sciences Institute, Cavite                                        |
| Maria Marissa          | Golla          | De La Salle Medical and Health Sciences Institute, Cavite                                        |
| Emmanuelle             | Gutierrez      | De La Salle Medical and Health Sciences Institute, Cavite                                        |
| Gidalthi Jonathan      | Ilagan         | De La Salle Medical and Health Sciences Institute, Cavite                                        |
| Dodge R.               | Lim            | National TB Reference Laboratory, Research Institute for Tropical Medicine, Department of Health |
| Jaiem                  | Maranan        | De La Salle Medical and Health Sciences Institute, Cavite                                        |
| Danaida                | Marcelo        | De La Salle Medical and Health Sciences Institute, Cavite                                        |
| Leonedy                | Masangcay      | De La Salle Medical and Health Sciences Institute, Cavite                                        |
| Jenkin                 | Mendoza        | National TB Reference Laboratory, Research Institute for Tropical Medicine, Department of Health |
| Angelita               | Pabruada       | De La Salle Medical and Health Sciences Institute, Cavite                                        |
| Laarean                | Perlas         | De La Salle Medical and Health Sciences Institute, Cavite                                        |
| Annalyn                | Reyes          | De La Salle Medical and Health Sciences Institute, Cavite                                        |
| Roeus Vincent Arjay G. | Reyes          | National TB Reference Laboratory, Research Institute for Tropical Medicine, Department of Health |

| First name          | Surname        | Affiliation                                                                                                                                                              |
|---------------------|----------------|--------------------------------------------------------------------------------------------------------------------------------------------------------------------------|
| Lorenzo             | Reyes          | National TB Reference Laboratory, Research Institute for Tropical Medicine, Department of Health                                                                         |
| Maria Guileane      | Sanchez-Pogosa | National TB Reference Laboratory, Research Institute for Tropical Medicine, Department of Health                                                                         |
| Maricef             | Tonquin        | De La Salle Medical and Health Sciences Institute, Cavite                                                                                                                |
| <b>South Africa</b> |                |                                                                                                                                                                          |
| Shima               | Abdulgardar    | Stellenbosch University, Cape Town, South Africa                                                                                                                         |
| Cammy               | Botha          | Stellenbosch University, Cape Town, South Africa                                                                                                                         |
| Brigitta            | Derendinger    | Stellenbosch University, Cape Town, South Africa                                                                                                                         |
| Jane                | Fortuin        | Stellenbosch University, Cape Town, South Africa                                                                                                                         |
| Siphosethu          | Gonya          | Stellenbosch University, Cape Town, South Africa                                                                                                                         |
| Chumani             | Hatile         | Stellenbosch University, Cape Town, South Africa                                                                                                                         |
| Megan               | Hendrikse      | Stellenbosch University, Cape Town, South Africa                                                                                                                         |
| Charlotte           | Lawn           | Stellenbosch University, Cape Town, South Africa                                                                                                                         |
| Disha               | Mathoorah      | Stellenbosch University, Cape Town, South Africa                                                                                                                         |
| Desiree Lem         | Mbu            | Stellenbosch University, Cape Town, South Africa                                                                                                                         |
| Zintle              | Ntetha         | Stellenbosch University, Cape Town, South Africa                                                                                                                         |
| Anna                | Okunola        | Stellenbosch University, Cape Town, South Africa                                                                                                                         |
| Zaida               | Palmer         | Stellenbosch University, Cape Town, South Africa                                                                                                                         |
| Fikiswa             | Seti           | Stellenbosch University, Cape Town, South Africa                                                                                                                         |
| Charmaine           | Van Der Walt   | Stellenbosch University, Cape Town, South Africa                                                                                                                         |
| Lusanda             | Yekani         | Stellenbosch University, Cape Town, South Africa                                                                                                                         |
| <b>Uganda</b>       |                |                                                                                                                                                                          |
| chriLucy            | Asege          | Walimu, Kampala, Uganda                                                                                                                                                  |
| Alice               | Bukirwa        | Walimu, Kampala, Uganda                                                                                                                                                  |
| David               | Katumba        | Walimu, Kampala, Uganda                                                                                                                                                  |
| Esther              | Kisakye        | Walimu, Kampala, Uganda                                                                                                                                                  |
| Wilson              | Mangeni        | Walimu, Kampala, Uganda                                                                                                                                                  |
| Job                 | Mukwatamundu   | Walimu, Kampala, Uganda                                                                                                                                                  |
| Sandra              | Mwebe          | Walimu, Kampala, Uganda                                                                                                                                                  |
| Annet               | Nakaweesa      | Walimu, Kampala, Uganda                                                                                                                                                  |
| Martha              | Nakaye         | Walimu, Kampala, Uganda                                                                                                                                                  |
| Talemwa             | Nalugwa        | Walimu, Kampala, Uganda                                                                                                                                                  |
| Irene               | Nassuna        | Walimu, Kampala, Uganda                                                                                                                                                  |
| Irene               | Nekesa         | Walimu, Kampala, Uganda                                                                                                                                                  |
| Justine             | Nyawere        | Walimu, Kampala, Uganda                                                                                                                                                  |
| John Baptist        | Ssonko         | Walimu, Kampala, Uganda                                                                                                                                                  |
| <b>Vietnam</b>      |                |                                                                                                                                                                          |
| Hai                 | Dang           | Vietnam National Tuberculosis Program-University of California San Francisco Research Collaboration Unit; Center for Promotion of Advancement of Society, Hanoi, Vietnam |
| Luong               | Dinh           | Vietnam National Lung Hospital                                                                                                                                           |
| Hang                | Do             | Hanoi Lung Hospital, Hanoi, Vietnam                                                                                                                                      |
| Tam                 | Do             | Hanoi Lung Hospital, Hanoi, Vietnam                                                                                                                                      |
| Thuong              | Do             | Vietnam National Lung Hospital                                                                                                                                           |
| Dung                | Dao            | Hanoi Lung Hospital, Hanoi, Vietnam                                                                                                                                      |
| Ha                  | Doan           | National TB reference Lab/ Vietnam National Lung Hospital, Hanoi, Vietnam                                                                                                |

| First name     | Surname        | Affiliation                                                                                                                                                              |
|----------------|----------------|--------------------------------------------------------------------------------------------------------------------------------------------------------------------------|
| Thien          | Doan           | Hanoi Lung Hospital, Hanoi, Vietnam                                                                                                                                      |
| Huy            | Ha             | Vietnam National Tuberculosis Program-University of California San Francisco Research Collaboration Unit, Center for Promotion of Advancement of Society, Hanoi, Vietnam |
| Oanh           | Lai            | Hanoi Lung Hospital, Hanoi, Vietnam                                                                                                                                      |
| Hien           | Le             | Vietnam National Tuberculosis Program-University of California San Francisco Research Collaboration Unit; Center for Promotion of Advancement of Society, Hanoi, Vietnam |
| Nguyet         | Le             | National TB reference Lab/ Vietnam National Lung Hospital, Hanoi, Vietnam                                                                                                |
| Anh            | Nguyen         | Hanoi Lung Hospital, Hanoi, Vietnam                                                                                                                                      |
| Hanh           | Nguyen         | Vietnam National Tuberculosis Program-University of California San Francisco Research Collaboration Unit; Center for Promotion of Advancement of Society, Hanoi, Vietnam |
| Hoa            | Nguyen         | Vietnam National Lung Hospital                                                                                                                                           |
| Hoang          | Nguyen         | Hanoi Lung Hospital, Hanoi, Vietnam                                                                                                                                      |
| Thanh          | Nguyen         | Hanoi Lung Hospital, Hanoi, Vietnam                                                                                                                                      |
| Yen            | Nguyen         | Hanoi Lung Hospital, Hanoi, Vietnam                                                                                                                                      |
| Ha             | Phan           | Vietnam National Tuberculosis Program-University of California San Francisco Research Collaboration Unit, Center for Promotion of Advancement of Society, Hanoi, Vietnam |
| Nam            | Pham           | Vietnam National Tuberculosis Program-University of California San Francisco Research Collaboration Unit, Hanoi Lung Hospital, Hanoi, Vietnam                            |
| Thuong         | Pham           | Hanoi Lung Hospital, Hanoi, Vietnam                                                                                                                                      |
| Trang          | Trinh          | Vietnam National Tuberculosis Program-University of California San Francisco Research Collaboration Unit, Center for Promotion of Advancement of Society, Hanoi, Vietnam |
| Phuong         | Vu             | Hanoi Lung Hospital, Hanoi, Vietnam                                                                                                                                      |
| Trung          | Vu             | National TB reference Lab/ Vietnam National Lung Hospital, Hanoi, Vietnam                                                                                                |
| <b>USA</b>     |                |                                                                                                                                                                          |
| Robert         | Castro         | University of California San Francisco, San Francisco, CA, USA                                                                                                           |
| Adithya        | Cattamanchi    | University of California Irvine, Irvine, CA, USA                                                                                                                         |
| Catherine      | Cook           | University of California San Francisco, San Francisco, CA, USA                                                                                                           |
| Sophie         | Huddart        | University of California San Francisco, San Francisco, CA, USA                                                                                                           |
| Devan          | Jaganath       | University of California San Francisco, San Francisco, CA, USA                                                                                                           |
| Midori         | Kato-Maeda     | University of California San Francisco, San Francisco, CA, USA                                                                                                           |
| Tessa          | Mochizuki      | University of California San Francisco, San Francisco, CA, USA                                                                                                           |
| Ruvandhi       | Nathavitharana | Beth Israel Deaconess Medical Center, Harvard Medical School, Boston, MA, USA                                                                                            |
| Payam          | Nahid          | University of California San Francisco, San Francisco, CA, USA                                                                                                           |
| Kevin          | Nolan          | University of California San Francisco, San Francisco, CA, USA                                                                                                           |
| Kinari         | Shah           | University of California San Francisco, San Francisco, CA, USA                                                                                                           |
| Swati          | Sudarsan       | University of California San Francisco, San Francisco, CA, USA                                                                                                           |
| Christina      | Yoon           | University of California San Francisco, San Francisco, CA, USA                                                                                                           |
| <b>Germany</b> |                |                                                                                                                                                                          |
| Maria del Mar  | Castro Noriega | Heidelberg University Hospital, Heidelberg, Germany                                                                                                                      |

| <b>First name</b>  | <b>Surname</b> | <b>Affiliation</b>                                  |
|--------------------|----------------|-----------------------------------------------------|
| Theresa            | Pfurtscheller  | Heidelberg University Hospital, Heidelberg, Germany |
| Seda               | Yerlikaya      | Heidelberg University Hospital, Heidelberg, Germany |
| <b>Switzerland</b> |                |                                                     |
| Matthew            | Arentz         | FIND, Geneva, Switzerland                           |
| Nathalie           | Frey           | FIND, Geneva, Switzerland                           |
| Sam                | Linsen         | FIND, Geneva, Switzerland                           |
