# Supplementary material for: Head-to-head comparison of diagnostic accuracy of TB screening tests: Chest-X-ray, Xpert TB host response, and C-reactive protein
Source: bioRxiv or medRxiv preprint supplement (doi:10.1101/2024.06.20.24308402), 2024-06-21
Supplement: Supplementary file [file media-2.pdf]

## APPENDIX

|                                                                                                                                             |    |
|---------------------------------------------------------------------------------------------------------------------------------------------|----|
| Table S1. R2D2 TB Network study enrolment sites and ethics committees .....                                                                 | 2  |
| Figure S1. Sequential testing algorithms. ....                                                                                              | 3  |
| Table S2. Summary of index test results by reference standard classification .....                                                          | 3  |
| Table S3. Results using subgroup-specific cut-points .....                                                                                  | 4  |
| Table S4. Positive predictive value and negative predictive value in a hypothetical cohort of 1,000 with 10% TB prevalence .....            | 5  |
| Table S5. The potential number of sputum tests averted by using a triage test in a hypothetical cohort of 1000 with 10% TB prevalence ..... | 6  |
| Figure S2. Sputum Xpert reference standard receiver operating characteristic curve.....                                                     | 7  |
| Figure S3. Selection of cut points for two-step screening algorithm combining CRP and CAD4TB.....                                           | 8  |
| Table S6. Head-to-head comparison of diagnostic accuracy against sputum Xpert reference standard.....                                       | 10 |
| Figure S5. Subgroup analysis of two-step screening algorithm Xpert HR-CAD4TB using a sequential negative serial screening algorithm. ....   | 11 |
| Figure S6. Subgroup analysis of two-step screening algorithm CRP-CAD4TB using a sequential negative serial screening algorithm. ....        | 12 |
| Figure S7. Subgroup analysis of two-step screening algorithm CRP-Xpert HR using a sequential negative serial screening algorithm. ....      | 13 |
| Figure S8. Subgroup analysis of two-step screening algorithm Xpert HR-CAD using a sequential negative serial screening algorithm. ....      | 14 |
| Table S7. Agreement between binary triage tests (percent agreement, Cohen's Kappa statistic).....                                           | 15 |

**Table S1. R2D2 TB Network study enrolment sites and ethics committees**

| City, Country                | Enrollment sites                                                                                                                                   | Ethics Committee*                                                                                                                                                                                                                                                |
|------------------------------|----------------------------------------------------------------------------------------------------------------------------------------------------|------------------------------------------------------------------------------------------------------------------------------------------------------------------------------------------------------------------------------------------------------------------|
| Vellore, India               | CMC Pulmonary Outpatient Department, Primary care clinics in Vellore (Shalom/LCC, Chittor, CHAD) and Chittoor (CMC satellite campus)               | Christian Medical College Institutional Review Board (13256)                                                                                                                                                                                                     |
| Hanoi, Vietnam               | Outpatient departments, Hanoi Lung Hospital                                                                                                        | Ministry of Health Ethical Committee for National Biological Medical Research (94/CN-HĐĐĐ); National Lung Hospital Ethical Committee for Biological Medical Research (566/2020/NCKH); Hanoi Lung Hospital Science and Technology Initiative Committee (22/BVPHN) |
| Dasmariñas City, Philippines | Community-based screening in Dasmariñas City and nearby municipalities, outpatient clinics in Dasmariñas City                                      | De La Salle Health Sciences Institute Independent Ethics Committee (2020-33-02-A)                                                                                                                                                                                |
| Cape Town, South Africa      | Scottsdene and Wallacedene primary care clinics; Brooklyn Chest Hospital; Khayelitsha District Health Center; Kraaifontein Community Health Clinic | Stellenbosch University Health Research Ethics Committee (M20/07/020)                                                                                                                                                                                            |
| Kampala, Uganda              | Mulago Outpatient Department, Kisenyi Health Center,                                                                                               | Makerere University, College of Health Sciences, School of Medicine, Research Ethics Committee (2020-182)                                                                                                                                                        |

\* The study was additionally approved by the University of California San Francisco Institutional Review Board (20-32670), and the University of Heidelberg Ethics Committee of the Medical Faculty (S-539/2020)

A. Sequential negative serial screening algorithm

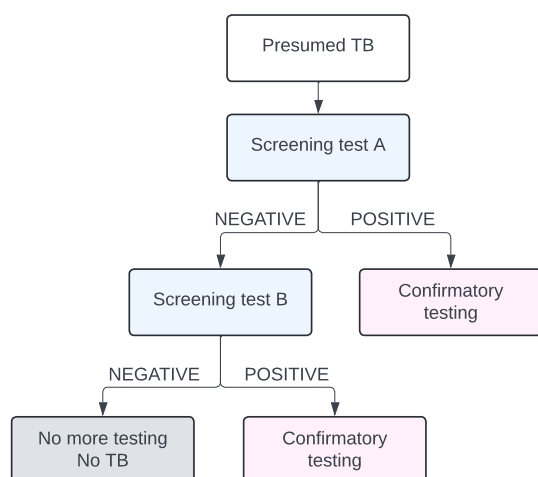

B. Sequential positive serial screening algorithm

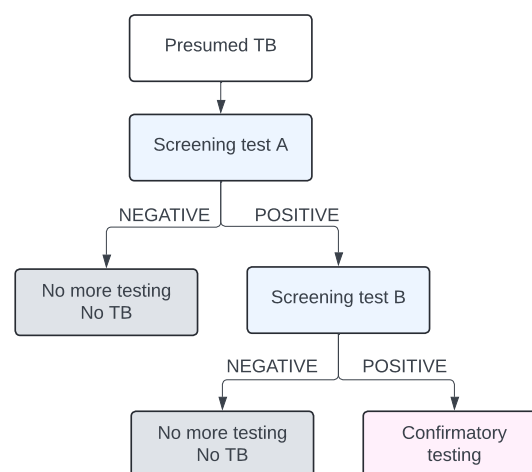

**Figure S1. Sequential testing algorithms.**

For each potential combination of screening tests, we considered a sequential negative serial screening approach (panel A) and a sequential positive serial screening approach (panel B).

**Table S2. Summary of index test results by reference standard classification**

| Microbiologic Reference Standard |                  |                    |                     |
|----------------------------------|------------------|--------------------|---------------------|
| Index test, mean (SD)            | Positive (n=303) |                    | Negative (n=1,089)  |
| CRP                              | 61.0 (65.3)      |                    | 15.6 (37.4)         |
| Xpert HR                         | -2.67 (0.94)     |                    | -1.15 (0.70)        |
| CAD4TB                           | 68.2 (26.0)      |                    | 20.1 (23.2)         |
| Sputum Xpert Reference Standard  |                  |                    |                     |
| Index test, mean (SD)            | Positive (n=274) | Negative (n=1,114) | Indeterminate (n=4) |
| CRP                              | 65.3 (65.9)      | 15.6 (37.5)        | 43.6 (36.2)         |
| Xpert HR                         | -2.79 (0.88)     | -1.16 (0.70)       | -2.19 (1.13)        |
| CAD4TB                           | 69.6 (25.1)      | 20.9 (24.0)        | 46.1 (39.2)         |

SD: standard deviation

**Table S3. Results using subgroup-specific cut-points**

| Using Philippines-specific cut-points<br>(N=326 people in the Philippines,<br>29 [9%] with TB) |                                                      |                         | Using female-specific cut-points<br>(N=623 females,<br>95 [15.3%] with TB) |                         |
|------------------------------------------------------------------------------------------------|------------------------------------------------------|-------------------------|----------------------------------------------------------------------------|-------------------------|
|                                                                                                | Quantitative value<br>indicating positive test       | Specificity<br>(95% CI) | Quantitative value<br>indicating positive<br>test                          | Specificity<br>(95% CI) |
| <b>One-step screening</b>                                                                      |                                                      |                         |                                                                            |                         |
| <b>CAD4TB</b>                                                                                  | TB score $\geq 7.1697$                               | 61.6%<br>(55.8, 67.2)   | TB score $\geq 6.005$                                                      | 53.7%<br>(49.4, 58.0)   |
| <b>Xpert HR</b>                                                                                | TB score $\leq -0.8499$                              | 45.5%<br>(39.7, 51.3)   | TB score $\leq 1.15$                                                       | 54.1%<br>(49.8, 58.4)   |
| <b>CRP</b>                                                                                     | Did not achieve 90%<br>sensitivity                   |                         | Did not achieve 90%<br>sensitivity                                         |                         |
| <b>Two-step screening using either test positive approach</b>                                  |                                                      |                         |                                                                            |                         |
| <b>Xpert HR-<br/>CAD4TB</b>                                                                    | Xpert HR $\leq -2.69$ or<br>CAD4TB score $\geq 6.73$ | 60.3%<br>(54.5, 65.9)   | Xpert HR $\leq -1.318$ or<br>CAD4TB score<br>$\geq 6.2393$                 | 63.8%<br>(59.6, 67.9)   |
| <b>CRP-CAD4TB</b>                                                                              | CRP $\geq 10.79$ or<br>CAD4TB score $\geq 10.49$     | 65.0%<br>(59.3, 70.4)   | CRP $\geq 36.105$ or<br>CAD4TB<br>score $\geq 10.988$                      | 61.9%<br>(57.7, 66.1)   |
| <b>CRP-Xpert HR</b>                                                                            | CRP $\geq 23.22$ or<br>Xpert HR $\leq -0.81$         | 45.5%<br>(39.7, 51.3)   | CRP $\geq 23.224$ or<br>Xpert HR $\leq -1.116$                             | 53.7%<br>(49.4, 58.0)   |
| <b>Two-step screening using both test positive approach</b>                                    |                                                      |                         |                                                                            |                         |
| <b>Xpert HR-<br/>CAD4TB*</b>                                                                   | Xpert HR $\leq -0.658$ and<br>CAD4TB $\geq 6.727$    | 71.4%<br>(65.9, 76.5)   | Xpert HR $\leq -1.015$ and<br>CAD4TB $\geq 3.079$                          | 63.2%<br>(59.0, 67.3)   |
| <b>CRP-CAD4TB</b>                                                                              | CRP has no added<br>value                            | -                       | -                                                                          | -                       |
| <b>CRP-Xpert HR</b>                                                                            | CRP has no added<br>value                            | -                       | -                                                                          | -                       |

CI: confidence interval; CAD: computer aided detection; CRP: C-reactive protein; HR: host response; TPP: target product profile

\* Meets current TPP target in the Philippines ( $\geq 90\%$  sensitivity,  $\geq 70\%$  specificity)

^ Meets current TPP target among females ( $\geq 90\%$  sensitivity,  $\geq 70\%$  specificity)



**Table S4. Positive predictive value and negative predictive value in a hypothetical cohort of 1,000 with 10% TB prevalence**

|                                                               | <b>Positive predictive value<br/>(95% CI)<br/>n=100 people with TB</b> | <b>Negative predictive value<br/>(95% CI)<br/>(n=900 people without TB)</b> |
|---------------------------------------------------------------|------------------------------------------------------------------------|-----------------------------------------------------------------------------|
| <b>One-step screening</b>                                     |                                                                        |                                                                             |
| CAD4TB                                                        | 25.2% (20.8, 30.0)                                                     | 98.4% (97.2, 99.3)                                                          |
| Xpert HR                                                      | 22.3% (18.3, 26.7)                                                     | 98.3% (96.9, 99.2)                                                          |
| CRP                                                           | 16.6% (13.5, 20.0)                                                     | 97.8% (96.0, 98.9)                                                          |
| <b>Two-step screening using either test positive approach</b> |                                                                        |                                                                             |
| Xpert HR-CAD4TB*                                              | 32.8% (27.3, 38.8)                                                     | 98.6% (97.5, 99.3)                                                          |
| CRP-CAD4TB*                                                   | 29.3% (24.3, 34.8)                                                     | 98.6% (97.4, 99.3)                                                          |
| CRP-Xpert HR                                                  | 21.8% (17.9, 26.2)                                                     | 98.3% (96.9, 99.2)                                                          |
| <b>Two-step screening using both test positive approach</b>   |                                                                        |                                                                             |
| Xpert HR-CAD4TB*                                              | 27.5% (22.8, 32.7)                                                     | 98.5% (97.3, 99.3)                                                          |

CI: confidence interval

**Table S5. The potential number of sputum tests averted by using a triage test in a hypothetical cohort of 1000 with 10% TB prevalence**

|                                                               | <b>Number that have first test performed (total population)</b> | <b>Number that have second test performed</b> | <b>Number of people with TB missed (n=100 with TB)</b> | <b>Number of people correctly classified by triage test</b> | <b>Number of people triage test positive, requiring sputum testing (N=1000 with presumptive TB)</b> | <b>Number of sputum tests averted (N=1000 with presumptive TB)</b> |
|---------------------------------------------------------------|-----------------------------------------------------------------|-----------------------------------------------|--------------------------------------------------------|-------------------------------------------------------------|-----------------------------------------------------------------------------------------------------|--------------------------------------------------------------------|
| <b>One-step screening</b>                                     |                                                                 |                                               |                                                        |                                                             |                                                                                                     |                                                                    |
| CAD4TB                                                        | 1,000                                                           | 0                                             | 10 (10%)                                               | 723 (72.3%)                                                 | 357 (35.7%)                                                                                         | 643                                                                |
| Xpert HR                                                      | 1,000                                                           | 0                                             | 10 (10%)                                               | 676 (67.6%)                                                 | 404 (40.4%)                                                                                         | 596                                                                |
| CRP                                                           | 1,000                                                           | 0                                             | 10 (10%)                                               | 537 (53.7%)                                                 | 543 (54.3%)                                                                                         | 457                                                                |
| <b>Two-step screening using either test positive approach</b> |                                                                 |                                               |                                                        |                                                             |                                                                                                     |                                                                    |
| Xpert HR-CAD4TB*                                              | 1,000                                                           | 765                                           | 10 (10%)                                               | 806 (80.6%)                                                 | 274 (27.4%)                                                                                         | 726                                                                |
| CAD4TB-Xpert HR*                                              |                                                                 | 728                                           |                                                        |                                                             |                                                                                                     |                                                                    |
| CRP-CAD4TB*                                                   | 1,000                                                           | 851                                           | 10 (10%)                                               | 773 (77.3%)                                                 | 307 (30.7%)                                                                                         | 693                                                                |
| CAD4TB-CRP*                                                   |                                                                 | 643                                           |                                                        |                                                             |                                                                                                     |                                                                    |
| CRP-Xpert HR                                                  | 1,000                                                           | 884                                           | 10 (10%)                                               | 668 (66.8%)                                                 | 412 (41.2%)                                                                                         | 588                                                                |
| Xpert HR-CRP                                                  |                                                                 | 541                                           |                                                        |                                                             |                                                                                                     |                                                                    |
| <b>Two-step screening using both test positive approach</b>   |                                                                 |                                               |                                                        |                                                             |                                                                                                     |                                                                    |
| Xpert HR-CAD4TB*                                              | 1,000                                                           | 712                                           | 10 (10%)                                               | 753 (75.3%)                                                 | 327 (32.7%)                                                                                         | 673                                                                |
| CAD4TB-Xpert HR*                                              |                                                                 | 463                                           |                                                        |                                                             |                                                                                                     |                                                                    |
| CAD4TB-CRP                                                    | 1,000                                                           | 435                                           | 10 (10%)                                               | 716 (71.6%)                                                 | 364 (36.4%)                                                                                         | 636                                                                |
| Xpert HR-CRP                                                  | 1,000                                                           | 476                                           | 10 (10%)                                               | 670 (67%)                                                   | 410 (41%)                                                                                           | 590                                                                |

Note. The order of tests in two-step screening does not impact the accuracy.

\* Meets current TPP target ( $\geq 90\%$  sensitivity,  $\geq 70\%$  specificity)

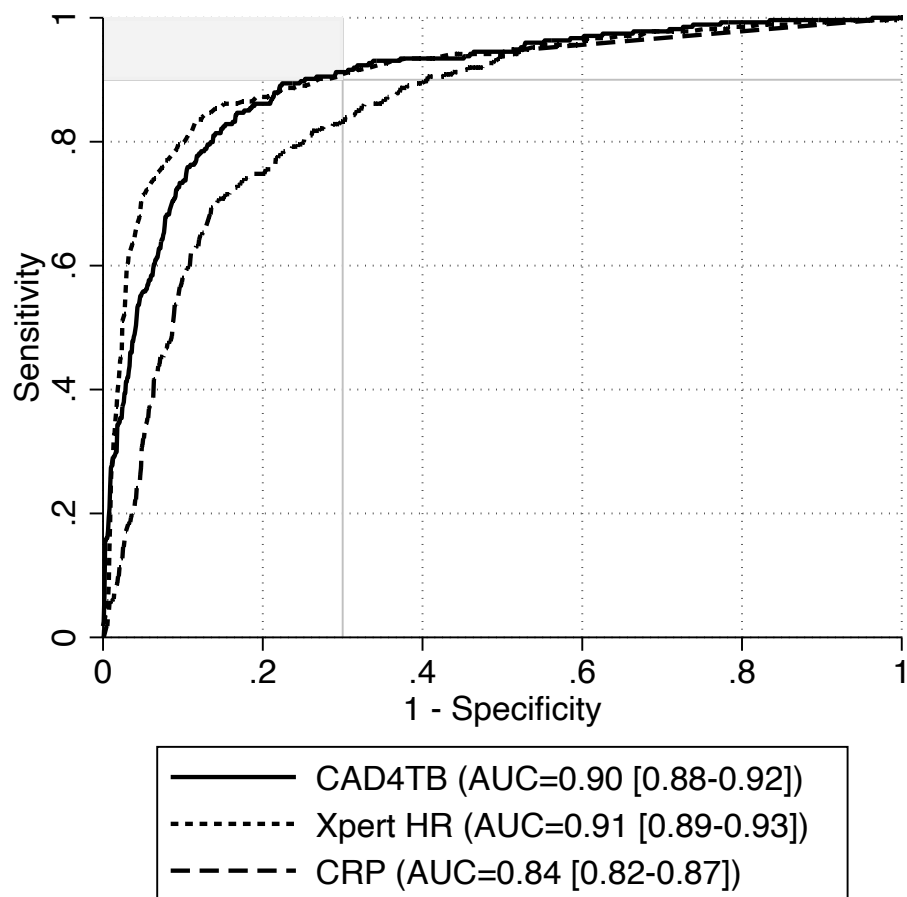

**Figure S2. Sputum Xpert reference standard receiver operating characteristic curve.** ROC curves with AUC and 95% CI displayed for CAD4TB, Xpert HR, and CRP. The upper-left area shaded in gray notes the region where tests meet TPP targets ( $\geq 90\%$  sensitivity,  $\geq 70\%$  specificity). N=1,388 participants from the Philippines, Vietnam, Uganda, South Africa, and India with presumptive TB (n=274, 20% with sputum Xpert-positive TB). 4 participants included in the primary analysis had an indeterminate sputum Xpert Ultra result and were excluded from this analysis.

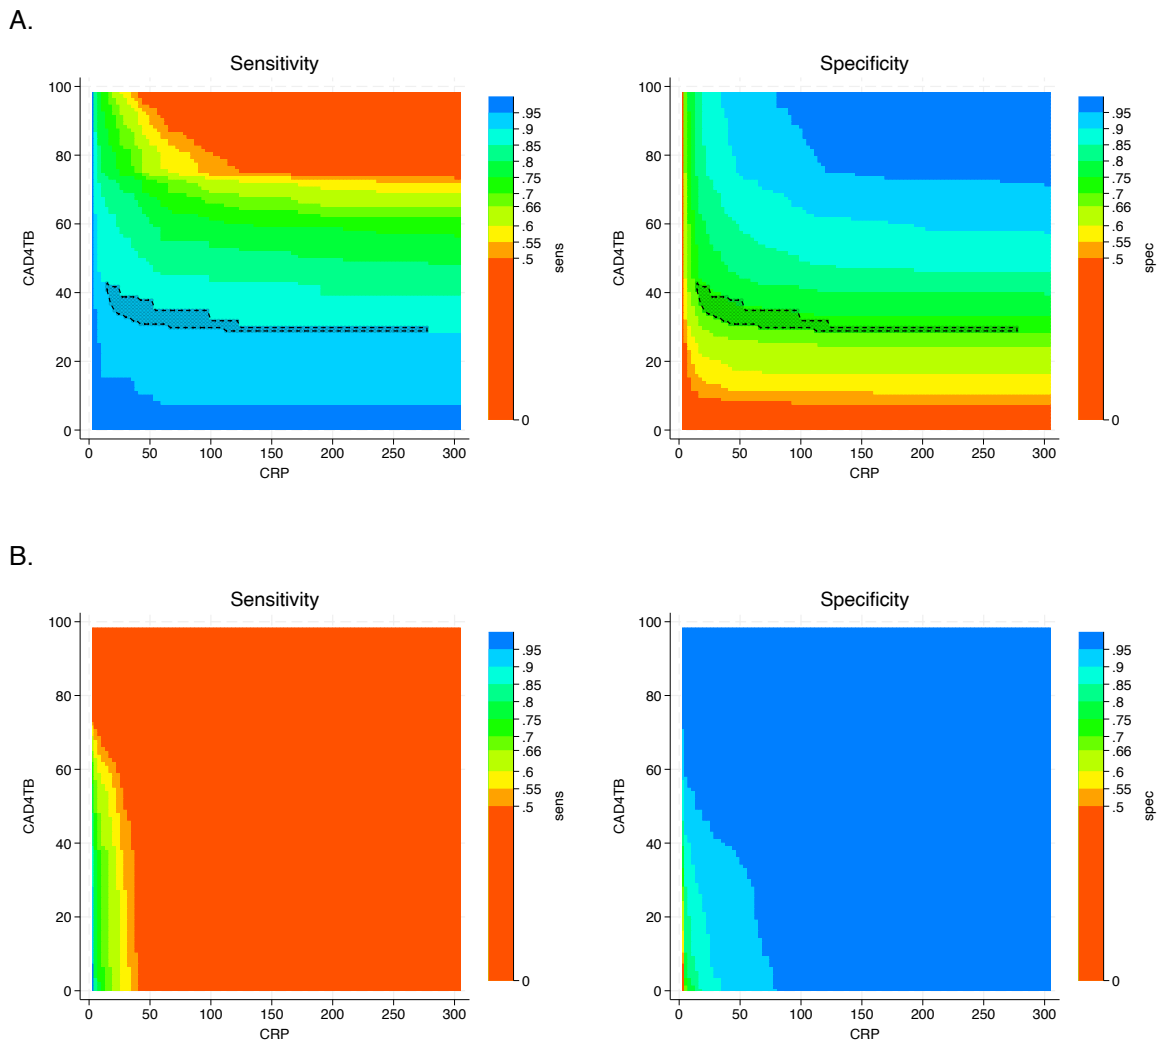

**Figure S3. Selection of cut points for two-step screening algorithm combining CRP and CAD4TB.** Panel (A) shows the possible cut-points using the sequential negative serial screening approach, in which the second screening test is conducted only if the first is negative and a positive screen is defined as positive on either test. Panel (B) shows the possible cut-points using the sequential positive serial screening approach, in which the second screening test is conducted only if the first is positive and a positive screen is defined as positive on both tests. The x-axis shows all potential cut-points for CAD4TB (test positive defined as greater than or equal to the cut point chosen), and the y-axis shows all potential cut points for CRP (test positive defined as greater than or equal to the cut point chosen). Each point on the graph corresponds to a pair of cut points used to define a positive screening algorithm. The colors represent the range of sensitivities and specificities possible. The outlined region contains pairs with sensitivity  $\geq 90\%$  and specificity  $\geq 70\%$  ( $n=310$  in panel A,  $n=0$  in panel B).

A.

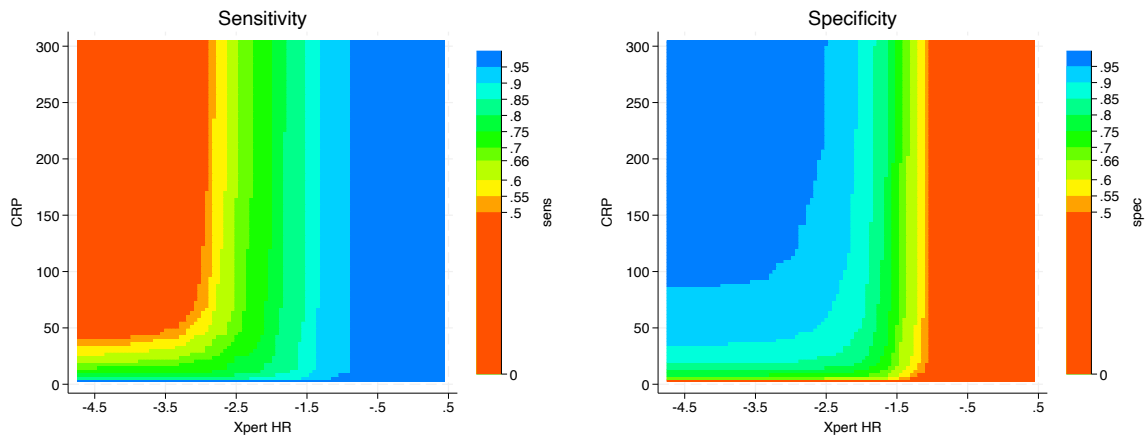

B.

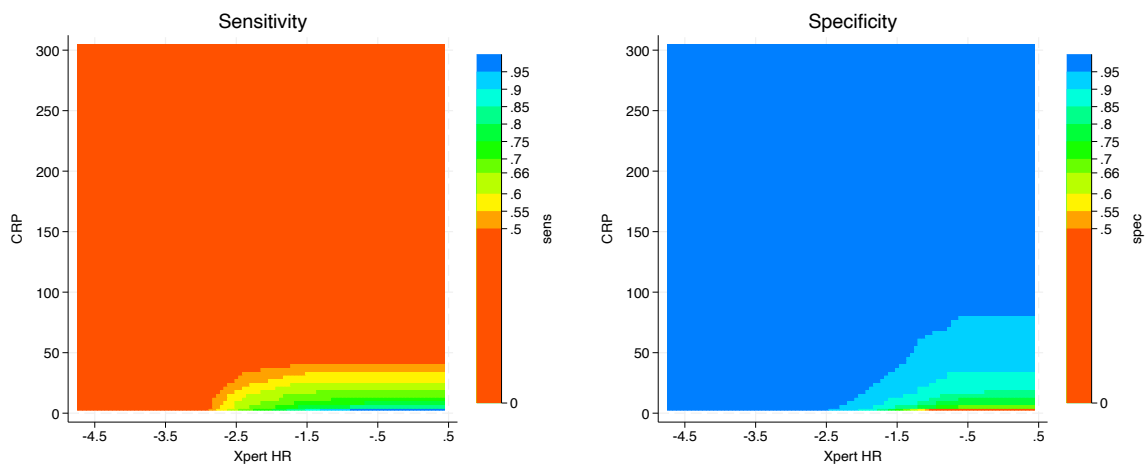

**Figure S4. Selection of cut points for two-step screening algorithm combining CRP and Xpert HR.** Panel (A) shows the possible cut-points using the sequential negative serial screening approach, in which the second screening test is conducted only if the first is negative and a positive screen is defined as positive on either test. Panel (B) shows the possible cut-points using the sequential positive serial screening approach, in which the second screening test is conducted only if the first is positive and a positive screen is defined as positive on both tests. The x-axis shows all potential cut-points for Xpert HR (test positive defined as less than or equal to the cut point chosen), and the y-axis shows all potential cut points for CRP (test positive defined as greater than or equal to the cut point chosen). Each point on the graph corresponds to a pair of cut points used to define a positive screening algorithm. The colors represent the range of sensitivities and specificities possible. No pair of cut points using either approach achieved sensitivity  $\geq 90\%$  and specificity  $\geq 70\%$ .

**Table S6. Head-to-head comparison of diagnostic accuracy against sputum Xpert reference standard.** Cut points were chosen to achieve  $\geq 90\%$  sensitivity and maximize specificity against the sputum Xpert reference standard.

| N=1,388                                                       | Quantitative value indicating positive test            | Specificity (95% CI)  | Absolute difference in specificity (95% CI) |                          |                       |
|---------------------------------------------------------------|--------------------------------------------------------|-----------------------|---------------------------------------------|--------------------------|-----------------------|
|                                                               |                                                        |                       | vs. CAD4TB                                  | vs. Xpert HR             | vs. CRP               |
| <b>One-step screening</b>                                     |                                                        |                       |                                             |                          |                       |
| <b>CAD4TB*</b>                                                | TB score $\geq 34.08$                                  | 74.7%<br>(72.0, 77.2) | -                                           | 1.7<br>(-1.7, 5.1)       | 15.4<br>(11.9, 18.8)  |
| <b>Xpert HR*</b>                                              | TB score $\leq -1.499$                                 | 73.0%<br>(70.3, 75.6) | -1.7<br>(-5.1, 1.7)                         | -                        | 13.6%<br>(10.3, 17.0) |
| <b>CRP</b>                                                    | $\geq 4.07$ mg/L                                       | 59.3%<br>(56.4, 62.2) | -15.4<br>(-18.8, -11.9)                     | -13.6%<br>(-17.0, -10.3) | -                     |
| <b>Two-step screening using either test positive approach</b> |                                                        |                       |                                             |                          |                       |
| <b>Xpert HR-CAD4TB*</b>                                       | CAD4TB $\geq 62.59$<br>or<br>Xpert HR $\leq -2.28$     | 85.1%<br>(82.9, 87.1) | 10.4<br>(7.9, 12.9)                         | 12.1<br>(9.4, 14.9)      | 25.8<br>(22.6, 29.0)  |
| <b>CRP-CAD4TB*</b>                                            | CRP $\geq 45.71$ mg/L<br>or<br>CAD4TB $\geq 39.16$     | 78.0%<br>(75.5, 80.4) | 3.3<br>(1.3, 5.3)                           | 5.0<br>(1.8, 8.3)        | 18.7<br>(15.5, 21.8)  |
| <b>CRP-Xpert HR*</b>                                          | CRP $\geq 265.23$ mg/L<br>or<br>Xpert HR $\leq -1.495$ | 72.9%<br>(70.2, 75.5) | -1.8<br>(-5.2, 1.6)                         | 0.1<br>(-0.4, 0.2)       | 13.6<br>(10.2, 16.9)  |
| <b>Two-step screening using both test positive approach</b>   |                                                        |                       |                                             |                          |                       |
| <b>Xpert HR-CAD4TB*</b>                                       | CAD4TB $\geq 31.82$<br>and<br>Xpert HR $\leq -0.76$    | 77.6%<br>(75.1, 80.1) | 3.0<br>(1.6, 4.3)                           | 4.7<br>(1.5, 7.9)        | 18.3<br>(15.0, 21.6)  |
| <b>CRP-CAD4TB</b>                                             | CRP has no added value                                 | -                     | -                                           | -                        | -                     |
| <b>CRP-Xpert HR</b>                                           | CRP has no added value                                 | -                     | -                                           | -                        | -                     |

CI: confidence interval; CAD: computer aided detection, represented by CAD4TB; CRP: C-reactive protein; HR: host response; TPP: target product profile

N=1,392 people with presumptive TB, n=274 with sputum Xpert Ultra positive TB

Note. 4 participants included in the primary analysis had an indeterminate sputum Xpert Ultra result and were excluded from this analysis.

\* Meets current TPP target ( $\geq 90\%$  sensitivity,  $\geq 70\%$  specificity)

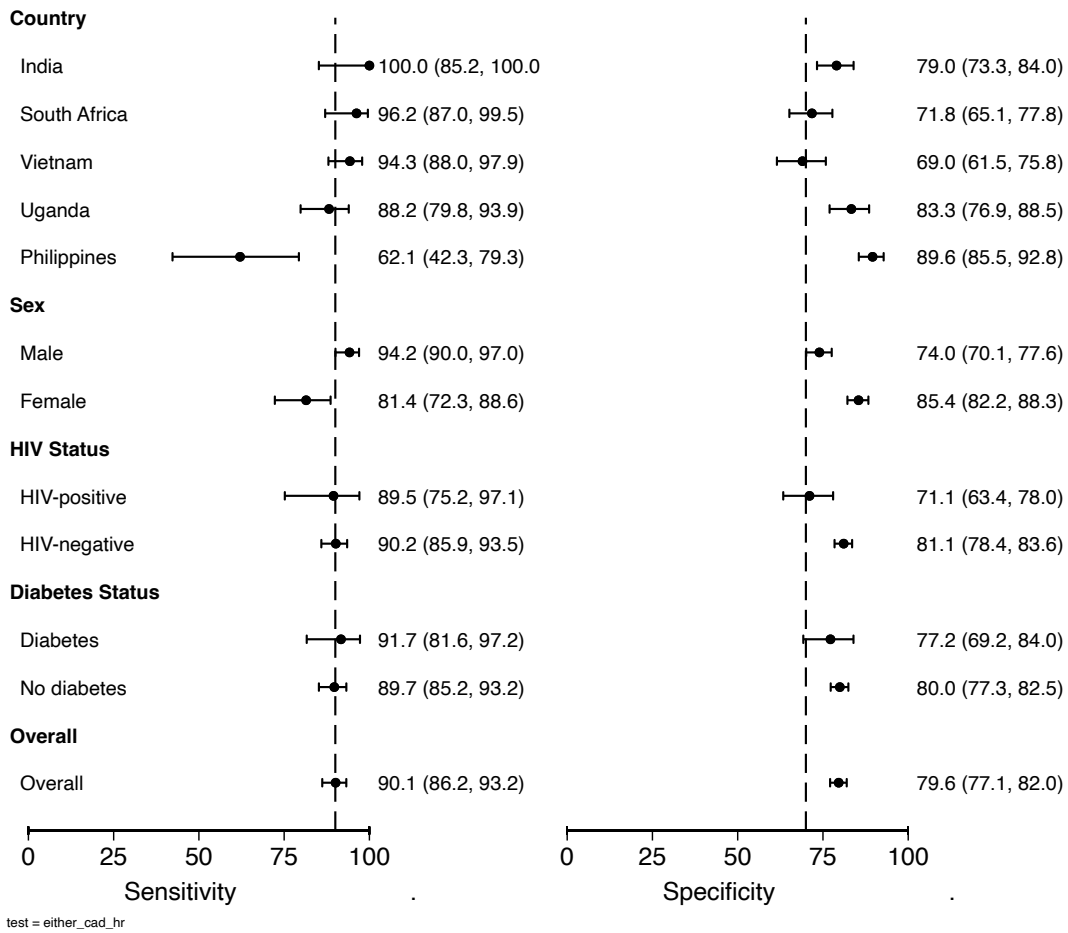

1  
2  
3  
4

**Figure S5. Subgroup analysis of two-step screening algorithm Xpert HR-CAD4TB using a sequential negative serial screening algorithm.**

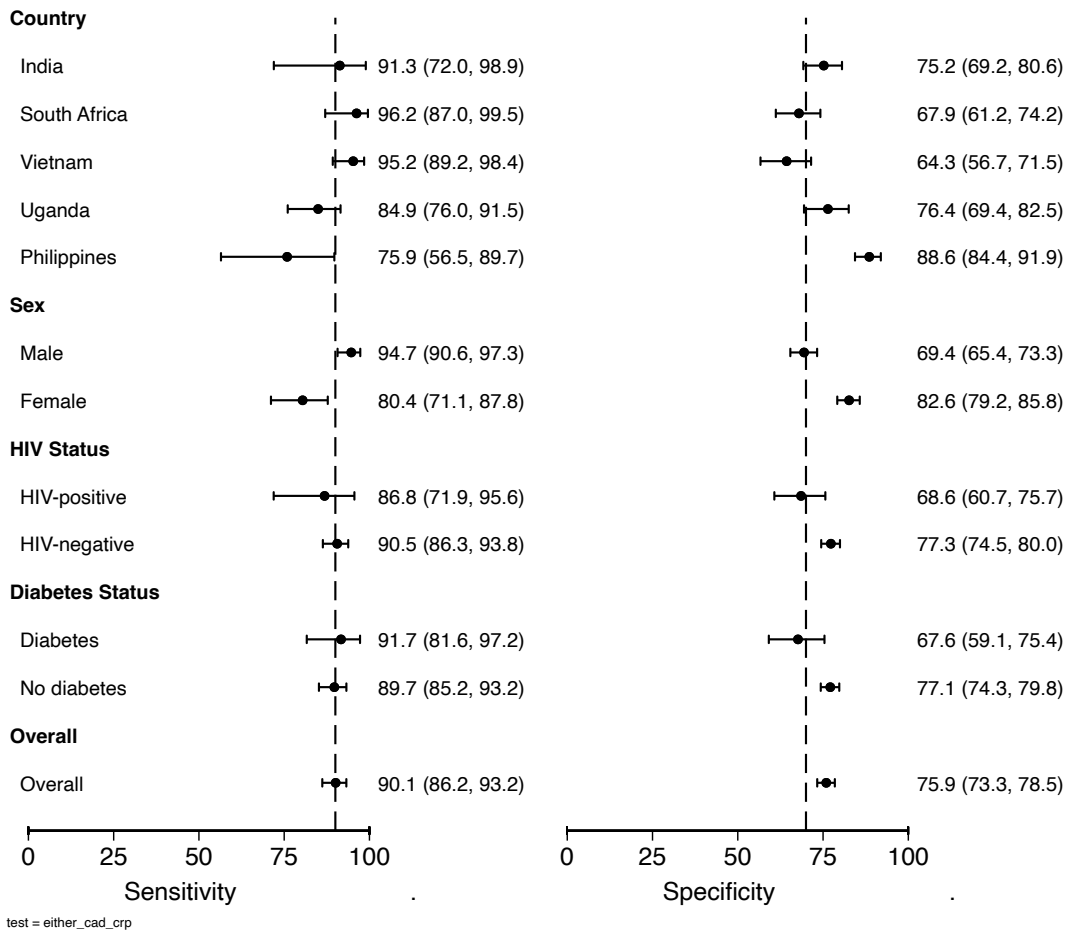

1  
2  
3  
4

**Figure S6. Subgroup analysis of two-step screening algorithm CRP-CAD4TB using a sequential negative serial screening algorithm.**



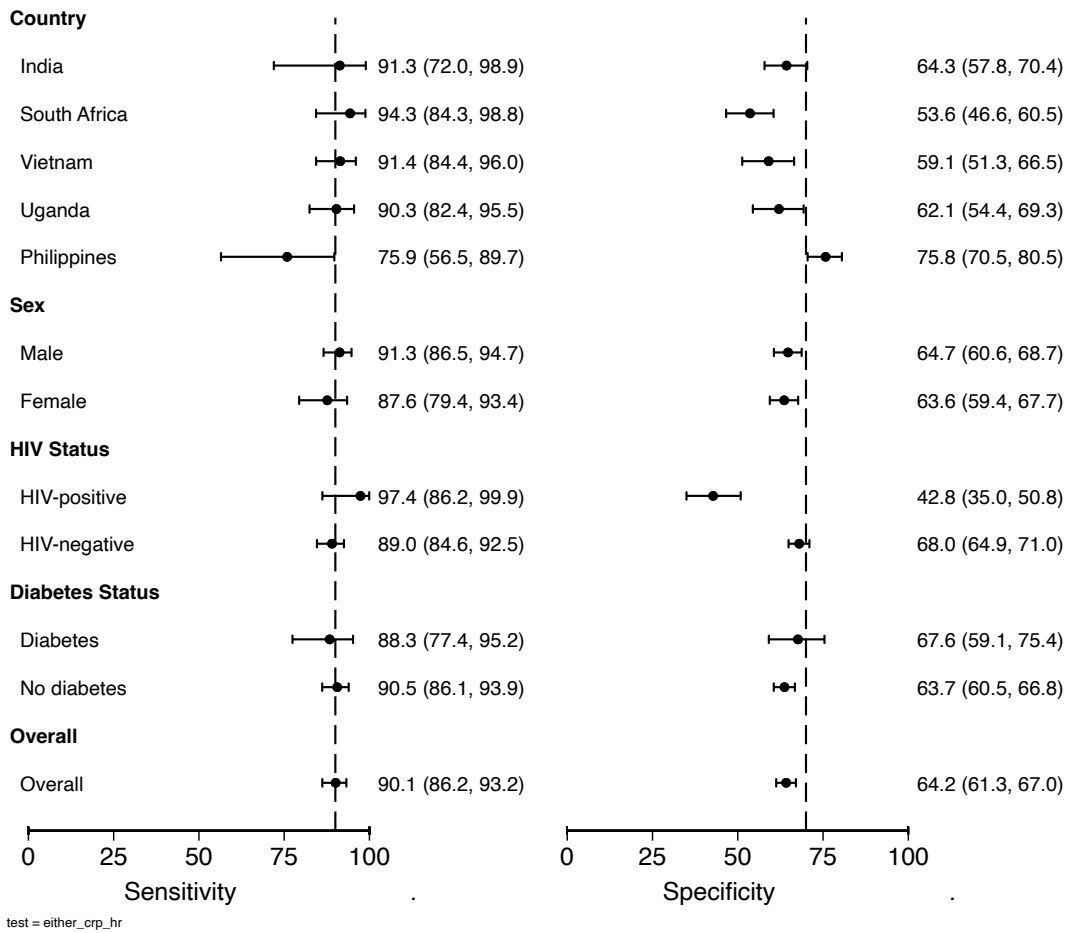

1  
2  
3  
4  
5

**Figure S7. Subgroup analysis of two-step screening algorithm CRP-Xpert HR using a sequential negative serial screening algorithm.**

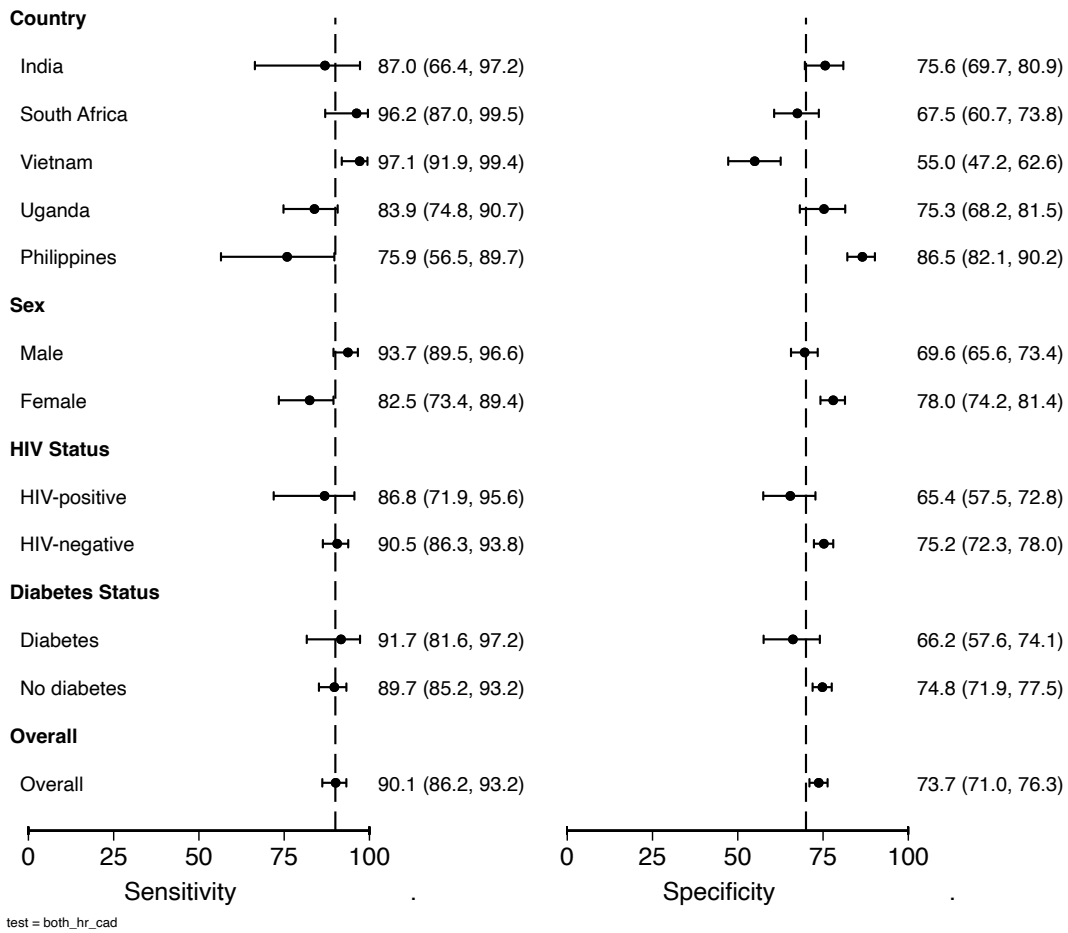

1  
2  
3  
4

**Figure S8. Subgroup analysis of two-step screening algorithm Xpert HR-CAD using a sequential negative serial screening algorithm.**

1 Table S7. Agreement between binary triage tests (percent agreement, Cohen's Kappa statistic)

| Percent agreement (Kappa)                 | CAD4TB | Xpert HR     | CRP          | CAD-Xpert HR (sequential negative) | CAD-CRP (sequential negative) | CRP-Xpert HR (sequential negative) | CAD-Xpert HR (sequential positive) | CAD-CRP (sequential positive) | CRP-Xpert HR (sequential positive) |
|-------------------------------------------|--------|--------------|--------------|------------------------------------|-------------------------------|------------------------------------|------------------------------------|-------------------------------|------------------------------------|
| <b>CAD4TB</b>                             | -      | 69.0% (0.38) | 65.5% (0.33) | 83.3% (0.65)                       | 92.0% (0.84)                  | 70.0% (0.40)                       | 92.0% (0.84)                       | 99.4% (0.99)                  | 69.0% (0.37)                       |
| <b>Xpert HR</b>                           | -      | -            | 69.4% (0.39) | 76.2% (0.51)                       | 71.8% (0.43)                  | 97.4% (0.95)                       | 75.1% (0.50)                       | 69.4% (0.38)                  | 99.4% (0.99)                       |
| <b>CRP</b>                                | -      | -            | -            | 66.1% (0.36)                       | 66.8% (0.36)                  | 71.1% (0.43)                       | 67.0% (0.36)                       | 65.8% (0.33)                  | 69.8% (0.40)                       |
| <b>CAD-Xpert HR (sequential negative)</b> | -      | -            | -            | -                                  | 88.5% (0.75)                  | 77.0% (0.53)                       | 83.5% (0.65)                       | 82.9% (0.64)                  | 75.7% (0.51)                       |
| <b>CAD-CRP (sequential negative)</b>      | -      | -            | -            | -                                  | -                             | 73.9% (0.47)                       | 88.9% (0.77)                       | 91.8% (0.83)                  | 71.6% (0.43)                       |
| <b>CRP-Xpert HR (sequential negative)</b> | -      | -            | -            | -                                  | -                             | -                                  | 75.7% (0.51)                       | 70.6% (0.41)                  | 97.1% (0.94)                       |
| <b>CAD-Xpert HR (sequential positive)</b> | -      | -            | -            | -                                  | -                             | -                                  | -                                  | 92.5% (0.85)                  | 75.1% (0.50)                       |
| <b>CAD-CRP (sequential positive)</b>      | -      | -            | -            | -                                  | -                             | -                                  | -                                  | -                             | 69.3% (0.38)                       |
| <b>CRP-Xpert HR</b>                       | -      | -            | -            | -                                  | -                             | -                                  | -                                  | -                             | -                                  |

|                                  |  |  |  |  |  |  |  |  |  |  |
|----------------------------------|--|--|--|--|--|--|--|--|--|--|
| <b>(sequential<br/>positive)</b> |  |  |  |  |  |  |  |  |  |  |
|----------------------------------|--|--|--|--|--|--|--|--|--|--|

1
